# Supplementary material
Source: Springer Nature journal article supplement (https://www.springermedizin.de/resource/supplementary/12963_2011_209_MOESM1_ESM.pdf/9572400)
Supplement: MOESM1 [file 9572400]

**Table 1. Descriptive Statistics of the U.S. Adult Population Ages 35-74 by Diabetes Status and Period**

|                                                   | No Diabetes |            | Pre-Diabetes |            | Diabetes   |            |
|---------------------------------------------------|-------------|------------|--------------|------------|------------|------------|
|                                                   | NHANES III  | NHANES CTS | NHANES III   | NHANES CTS | NHANES III | NHANES CTS |
| Sample size                                       | 6,277       | 4,014      | 1,679        | 660        | 1,254      | 796        |
| Mean age, y                                       | 49.45       | 49.47      | 56.19        | 55.52      | 57.11      | 56.99      |
| Hispanic, %                                       | 7.62        | 10.84      | 10.26        | 15.65      | 11.25      | 16.91      |
| Non-Hispanic Black, %                             | 7.32        | 8.71       | 20.07        | 16.67      | 17.69      | 17.79      |
| Education, %                                      |             |            |              |            |            |            |
| Less than High School                             | 20.99       | 17.66 †    | 35.63        | 29.06      | 44.35      | 37.61      |
| High School                                       | 33.21       | 24.45 †    | 35.56        | 28.52 †    | 33.15      | 24.84 †    |
| More than High School                             | 45.80       | 57.89 †    | 28.82        | 42.42 †    | 22.51      | 37.55 †    |
| Smoking Status, %                                 |             |            |              |            |            |            |
| Current                                           | 25.43       | 23.91      | 37.63        | 22.13 †    | 22.01      | 19.13      |
| Former                                            | 31.51       | 28.51 †    | 30.04        | 33.85      | 40.98      | 34.56      |
| Never                                             | 43.06       | 47.58 †    | 32.33        | 44.02 †    | 37.02      | 46.31 †    |
| Mean BMI <sup>a</sup> (kg/m <sup>2</sup> )        | 26.69       | 27.73 †    | 28.85        | 31.74 †    | 31.41      | 32.86 †    |
| BMI <sup>a</sup> category (kg/m <sup>2</sup> ), % |             |            |              |            |            |            |
| 30 to 35                                          | 15.09       | 17.41 †    | 20.34        | 31.98 †    | 28.25      | 25.68      |
| More than 35                                      | 6.88        | 10.48 †    | 15.33        | 24.27 †    | 26.20      | 33.15 †    |
| Mean HbA1c                                        | 5.16        | 5.24 †     | 5.99         | 5.97       | 8.11       | 8.00       |

BMI: body mass index; HbA1c: Hemoglobin A1c; a. BMI derived from measured data on height and weight; No Diabetes is defined as HbA1c less than 5.7%; Pre-Diabetes is defined as HbA1c between 5.7 and 6.5%; Diabetes is defined as HbA1c above 6.5% or on treatment for diabetes. Sources: National Health and Nutrition Examination Survey (NHANES) III (1988-1994) and continuous (CTS) (1999-2002).

† Significantly different ( $p < 0.05$ ) compared with NHANES III

**Table 2. All-Cause Mortality Rates (per 1,000 person-years) and Relative Risks for the US Adult Population by Diabetes Status and Period**

|                     | NHANES III<br>(1988-2001) | NHANES CTS<br>(1999-2006)     |
|---------------------|---------------------------|-------------------------------|
| <i>No Diabetes</i>  |                           |                               |
| Mortality Rate      | 7.81 (6.70-8.93)          | 6.04 (4.77-7.32) <sup>†</sup> |
| Relative Risk       | 1.00                      | 1.00                          |
| <i>Pre-Diabetes</i> |                           |                               |
| Mortality Rate      | 11.19 (8.38-14.00)        | 14.02 (8.47-19.58)            |
| Relative Risk       | 1.43 (1.12-1.74)          | 2.32 (1.24-3.40)              |
| <i>Diabetes</i>     |                           |                               |
| Mortality Rate      | 20.34 (16.00-24.67)       | 20.82 (13.10-28.54)           |
| Relative Risk       | 2.60 (1.91-3.29)          | 3.45 (2.02-4.87)              |
| Deaths              | 960                       | 341                           |
| Person-years        | 67,526                    | 30,989                        |

HbA1c: Hemoglobin A1c; No Diabetes is defined as HbA1c less than 5.7%; Pre-Diabetes is defined as HbA1c between 5.7 and 6.5%; Diabetes is defined as HbA1c above 6.5% or on treatment for diabetes. Sample includes persons ages 35-74 at baseline. Entry years are 1988-1994 with follow-up through 2001 for the earlier period and 1999-2002 with follow-up through 2006 for the later period. Mortality rates are age-standardized to the year 2000 Census population using age groups 35-54, 55-69 and 70-84. Relative risks are based on age-standardized mortality rates and are otherwise unadjusted. All estimates are weighted and account for complex survey design. Sources: National Health and Nutrition Examination Survey (NHANES) III and continuous (CTS).

<sup>†</sup> Significantly different (p<0.05) compared with NHANES III

**Table 3. Hazard Ratios Predicting Mortality from All Causes**

|                          | Model 1      |             | Model 2      |             | Model 3      |             |
|--------------------------|--------------|-------------|--------------|-------------|--------------|-------------|
|                          | Hazard Ratio | 95% CI      | Hazard Ratio | 95% CI      | Hazard Ratio | 95% CI      |
| Sex                      |              |             |              |             |              |             |
| Women                    | 1.00         |             | 1.00         |             | 1.00         |             |
| Men                      | 1.54 ***     | (1.34-1.76) | 1.30 ***     | (1.13-1.50) | 1.33 ***     | (1.16-1.53) |
| Race/ethnicity           |              |             |              |             |              |             |
| Other                    | 1.00         |             | 1.00         |             | 1.00         |             |
| Hispanic                 | 0.76         | (0.57-1.02) | 0.83         | (0.62-1.12) | 0.84         | (0.63-1.13) |
| Non-Hispanic Black       | 1.48 ***     | (1.21-1.82) | 1.51 ***     | (1.23-1.84) | 1.49 ***     | (1.22-1.81) |
| Education Level          |              |             |              |             |              |             |
| Less than High School    | 1.00         |             | 1.00         |             | 1.00         |             |
| High School              | 0.78 **      | (0.65-0.93) | 0.79 **      | (0.66-0.94) | 0.79 **      | (0.67-0.94) |
| More than High School    | 0.61 ***     | (0.50-0.74) | 0.68 ***     | (0.56-0.83) | 0.67 ***     | (0.55-0.82) |
| Smoking                  |              |             |              |             |              |             |
| Never Smoker             | -            |             | 1.00         |             | 1.00         |             |
| Former Smoker            | -            |             | 1.83 ***     | (1.46-2.29) | 1.83 ***     | (1.46-2.29) |
| Current Smoker           | -            |             | 2.90 ***     | (2.24-3.75) | 2.73 ***     | (2.11-3.52) |
| BMI                      | -            |             | -            |             | 0.87 ***     | (0.82-0.93) |
| BMI Squared              | -            |             | -            |             | 1.00 ***     | (1.00-1.00) |
| Period <sup>a</sup>      | 0.86         | (0.65-1.13) | 0.86         | (0.66-1.13) | 0.88         | (0.67-1.15) |
| Dysglycemia <sup>b</sup> | 1.63 ***     | (1.38-1.92) | 1.55 ***     | (1.31-1.83) | 1.62 ***     | (1.36-1.93) |
| Dysglycemia X Period     | 1.34         | (0.94-1.92) | 1.45 *       | (1.02-2.07) | 1.46 *       | (1.03-2.08) |

a. Period is an indicator variable which takes a value of 1 in the later of the two periods in the analysis. Entry years are 1988-1994 with follow-up through 2001 for the earlier period and 1999-2002 with follow-up through 2006 for the later period; b. Dysglycemia sample includes persons with HbA1c $\geq$ 5.7% or on treatment for diabetes. Reference categories for categorical variables indicated by HR=1.00; Sample includes persons ages 35-74 at baseline. All estimates are weighted and account for complex survey design. Sources: National Health and Nutrition Examination Survey III and continuous.

\*\*\*p<0.001; \*\*<0.01; \*p<0.05
